# Supplementary material
Source: PubMed Central journal article supplement (PMC3175949)
Supplement: 10-6385_z7g999111676sf01.pdf [file 10-6385_z7g999111676sf01.pdf]

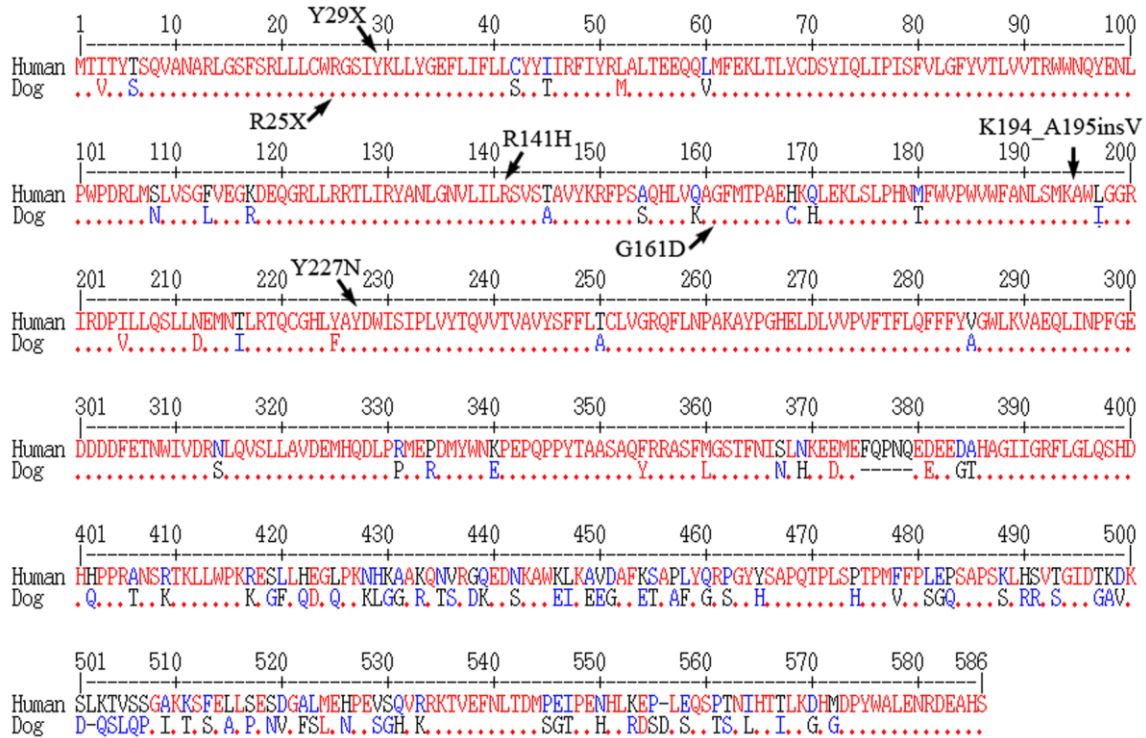

**Supplementary Figure 1.** Amino acid sequence alignment of *H. sapiens* (AAC64343) and *C. familiaris* (NP\_001091014) bestrophin-1. Identical amino acids are denoted by the red dots. As highlighted (black arrows), each mutated Best1 residue examined in this study is fully conserved between humans and dogs. Alignment based on: <http://multalin.toulouse.inra.fr/multalin/multalin.html>.
